# Supplementary material for: Blood Pressure in Critically Ill Children: Exploratory Analyses of Concurrent Invasive and Noninvasive Measurements
Source: PubMed Central journal article supplement — Crit Care Explor. 2021 Dec 2;3(12):e0586. doi: 10.1097/CCE.0000000000000586 (PMC8718171; doi:10.1097/cce.0000000000000586), 2021-12-02
Supplement: cc9-3-e0586-s001.pdf [file cc9-3-e0586-s001.pdf]

Supplemental Table 1 – measurement ranges for NIBP (in mmHg) for the Philips MP70 monitor using different settings

|           | Systolic | Diastolic | Mean   |
|-----------|----------|-----------|--------|
| Neonatal  | 30-130   | 10-100    | 20-120 |
| Pediatric | 30-180   | 10-150    | 20-160 |
| Adult     | 30-270   | 10-245    | 20-255 |
